# Supplementary material for: ITGAM is a critical gene in ischemic stroke
Source: publisher site journal article supplement (doi:10.18632/aging.205729), 2024-04-17
Supplement: Supplementary file [file aging-v16i8-205729-supplementary-material-SD1.pdf]

SUPPLEMENTARY FIGURE

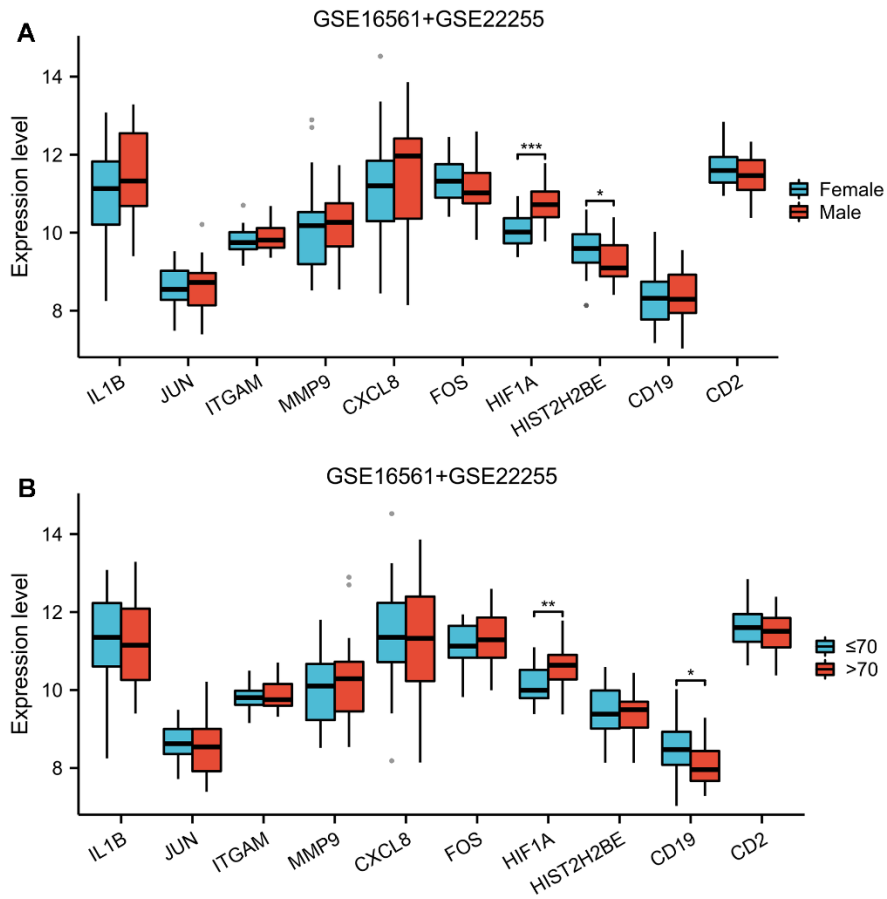

**Supplementary Figure 1. Clinical correlation analysis of hub genes.** Box plot showing the expression pattern of the hub genes in different genders (male and female, **A**) and ages ( $\leq 70$  and  $>70$ , **B**) of patients in the GSE16561+GSE22255 dataset.
