# Supplementary material for: ITGAM is a critical gene in ischemic stroke
Source: Aging (Albany NY). 2024 Apr 17;16(8):6852–67. doi: 10.18632/aging.205729 (PMC11087101; doi:10.18632/aging.205729)
Supplement: Supplementary Table 1 [file aging-16-205729-s002.xls]

## Sheet: Table S1
Supplementary Table 1. 226 differentially expressed genes.
Tag	logFC	AveExpr	t	P.Value	adj.P.Val	B
EIF3G	-0.38217	11.9458	-7.66849	9.8e-12	5.52e-08	16.2503
NDUFS8	-0.420215	10.0769	-7.43596	3.1e-11	1.06e-07	15.1633
ICAM2	-0.490439	11.4545	-7.31414	5.65e-11	1.59e-07	14.5973
HIGD2A	-0.38523	11.0369	-6.69142	1.15e-09	1.55e-06	11.7506
ECHDC2	-0.518446	9.56412	-6.37546	5.14e-09	4.82e-06	10.3413
ID3	-0.595908	8.28716	-6.35015	5.79e-09	5.14e-06	10.2296
ARG1	0.8879	7.19824	6.31822	6.72e-09	5.43e-06	10.0889
BANF1	-0.498612	10.8554	-6.31719	6.75e-09	5.43e-06	10.0844
FNBP4	-0.406241	9.17524	-6.28896	7.71e-09	5.44e-06	9.9603
PCID2	-0.433542	9.94118	-5.98429	3.14e-08	1.16e-05	8.63648
DNAJC30	-0.396195	8.2417	-5.94307	3.79e-08	1.3e-05	8.45966
PLXDC2	0.436343	8.86746	5.9089	4.43e-08	1.41e-05	8.31355
SLC22A4	0.549398	9.0104	5.85161	5.74e-08	1.7e-05	8.06943
CKAP4	0.496869	9.83732	5.77932	7.95e-08	2.27e-05	7.76306
ZFP3	-0.410688	7.60932	-5.76485	8.48e-08	2.37e-05	7.70197
HIST2H2BE	0.607918	9.16393	5.74997	9.07e-08	2.39e-05	7.63918
ITGAM	0.379757	9.67408	5.7087	1.09e-07	2.83e-05	7.46555
CUTA	-0.379219	10.7808	-5.68309	1.22e-07	3.08e-05	7.35813
APRT	-0.396015	10.1357	-5.67473	1.27e-07	3.13e-05	7.3231
PCSK7	-0.380465	9.2832	-5.6709	1.29e-07	3.13e-05	7.30709
MAT2A	-0.378603	10.4212	-5.6273	1.57e-07	3.31e-05	7.12495
LSM2	-0.409712	9.90874	-5.60832	1.71e-07	3.51e-05	7.0459
NDUFA12	-0.381523	11.2462	-5.58179	1.92e-07	3.68e-05	6.93563
EVL	-0.528651	11.2094	-5.54344	2.27e-07	4.17e-05	6.77669
GIMAP6	-0.501662	10.2036	-5.53401	2.37e-07	4.19e-05	6.73771
IL1RAP	0.40438	7.28858	5.45696	3.32e-07	5e-05	6.42042
C5AR1	0.528714	11.4654	5.42864	3.76e-07	5.36e-05	6.30437
DUSP1	0.576545	11.9857	5.40197	4.22e-07	5.74e-05	6.19543
CLEC4D	0.532241	8.42741	5.40028	4.25e-07	5.74e-05	6.18855
MT1X	-0.460119	10.0856	-5.4001	4.25e-07	5.74e-05	6.18781
FOS	0.784876	10.8935	5.3918	4.41e-07	5.77e-05	6.15395
PIP4P2	0.45492	8.95306	5.34827	5.33e-07	6.45e-05	5.97691
SNRPF	-0.382988	10.7754	-5.29237	6.78e-07	7.53e-05	5.75072
STAG3L3	-0.401824	9.24871	-5.28564	6.98e-07	7.6e-05	5.72359
NFIL3	0.715487	9.77567	5.24858	8.18e-07	8.44e-05	5.57447
VNN3	0.443057	7.83049	5.24292	8.38e-07	8.44e-05	5.55175
DPYD	0.424792	8.49252	5.24038	8.47e-07	8.44e-05	5.54155
ETS2	0.535518	9.07004	5.23442	8.69e-07	8.48e-05	5.51767
MIF	-0.383639	11.4716	-5.18808	1.06e-06	9.88e-05	5.33234
PTPRCAP	-0.538645	10.2759	-5.17728	1.11e-06	0.000100355	5.28925
PDZD8	0.380188	7.77351	5.14032	1.3e-06	0.000111218	5.14228
CPD	0.414588	9.20607	5.13776	1.31e-06	0.000111861	5.13214
GPR18	-0.53349	9.35843	-5.12781	1.37e-06	0.000114368	5.09268
CD79B	-0.459697	8.99285	-5.09884	1.55e-06	0.00012399	4.97808
CD55	0.44009	11.0371	5.01586	2.19e-06	0.000158827	4.65192
ITPR3	-0.395631	8.9205	-4.99949	2.35e-06	0.000167205	4.58794
CLEC4E	0.485913	8.62416	4.99078	2.43e-06	0.000169872	4.55396
IRS2	0.541975	10.0061	4.98902	2.45e-06	0.000169872	4.5471
RGS2	0.429187	14.0004	4.96747	2.68e-06	0.000180428	4.46316
GRAP	-0.423057	8.79667	-4.95629	2.81e-06	0.00018752	4.41972
RPS4X	-0.386055	13.7119	-4.94953	2.89e-06	0.000187669	4.39348
CD163	0.475478	8.58913	4.93837	3.03e-06	0.000193707	4.35019
BIN1	-0.439593	10.2877	-4.93598	3.06e-06	0.000193707	4.34092
BCL6	0.481064	10.9142	4.9355	3.06e-06	0.000193707	4.33907
LHFPL2	0.391546	8.43749	4.93317	3.09e-06	0.00019477	4.33004
SLC2A3	0.531378	11.8883	4.93075	3.12e-06	0.00019477	4.32069
MXD1	0.473088	11.11	4.919	3.28e-06	0.000200646	4.27523
TRIB1	0.390837	8.96969	4.87669	3.91e-06	0.000227418	4.11206
NOSIP	-0.403459	11.3598	-4.87561	3.92e-06	0.000227642	4.10793
KLF4	0.458147	9.71475	4.85433	4.28e-06	0.000241826	4.02619
ITPRIP	0.509953	9.98295	4.82666	4.8e-06	0.000262132	3.92027
ADM	0.712065	10.7925	4.82372	4.86e-06	0.00026445	3.90902
TMEM88	0.405918	7.55198	4.7917	5.54e-06	0.000293835	3.78696
TMEM204	-0.426789	8.11222	-4.76234	6.24e-06	0.000322029	3.6755
GPAT3	0.431672	9.55381	4.7593	6.32e-06	0.000324048	3.66398
PLAAT4	-0.383572	11.9049	-4.75208	6.5e-06	0.000328702	3.63663
SLC2A14	0.578968	8.61095	4.7383	6.88e-06	0.000341458	3.58454
FCMR	-0.55273	11.0444	-4.72672	7.21e-06	0.000353129	3.54082
MARCKS	0.515893	10.9981	4.70853	7.76e-06	0.000373662	3.47228
MMP9	0.859448	9.75014	4.68401	8.56e-06	0.000398259	3.38018
NCR3	-0.405817	8.54805	-4.67461	8.89e-06	0.000408525	3.34494
KCNJ15	0.389679	7.60191	4.66938	9.08e-06	0.000413249	3.32536
HIST2H2AA3	0.416926	10.0528	4.64688	9.94e-06	0.000437038	3.24129
CTSZ	0.424178	8.98026	4.63262	1.05e-05	0.00045402	3.18812
GADD45A	0.538894	9.18185	4.62305	1.09e-05	0.00046866	3.1525
IFRD1	0.451387	8.84665	4.623	1.09e-05	0.00046866	3.15233
CRISPLD2	0.496586	9.65908	4.61871	1.11e-05	0.000472476	3.13639
MEGF9	0.430468	9.03027	4.6121	1.14e-05	0.000474064	3.11182
CD7	-0.469968	10.3766	-4.60833	1.16e-05	0.000474064	3.09784
PVRIG	-0.430903	9.73916	-4.58732	1.26e-05	0.00050446	3.01996
CD6	-0.493984	9.73587	-4.56926	1.35e-05	0.000525791	2.95322
TLN1	0.388954	9.06189	4.55446	1.44e-05	0.000542602	2.89865
IL32	-0.470817	11.0011	-4.55278	1.45e-05	0.000544989	2.89249
F13A1	0.618087	10.2988	4.5285	1.59e-05	0.000583004	2.80322
ARL4A	0.403691	8.34707	4.52551	1.61e-05	0.000584559	2.79226
LGALSL	0.442653	7.37183	4.52528	1.61e-05	0.000584559	2.79141
ATP6V0E2	-0.427779	9.85596	-4.52047	1.64e-05	0.000588992	2.77378
MTMR6	0.394204	8.91195	4.51519	1.68e-05	0.000597566	2.75445
MGAM	0.432391	7.53316	4.49374	1.83e-05	0.000635467	2.676
LIME1	-0.421947	10.9051	-4.47401	1.97e-05	0.000670026	2.60411
MME	0.438134	8.11369	4.46627	2.03e-05	0.000686517	2.57594
RBP7	0.419	9.80221	4.44839	2.18e-05	0.000721805	2.51102
IL1R2	0.57191	8.73788	4.44668	2.2e-05	0.00072522	2.50482
LBH	-0.401718	9.63631	-4.38572	2.78e-05	0.000857168	2.28486
CRIP2	-0.418039	7.56704	-4.37396	2.91e-05	0.000880893	2.24264
CCR7	-0.685216	10.9795	-4.34865	3.21e-05	0.000929771	2.15208
SLC22A15	0.410722	8.51247	4.33618	3.37e-05	0.000968852	2.10759
CA4	0.5194	8.19441	4.32779	3.48e-05	0.000986495	2.0777
TRIB2	-0.398548	8.92901	-4.32413	3.53e-05	0.000996088	2.0647
BAZ2B	0.404356	9.63917	4.31332	3.68e-05	0.00101952	2.02627
PTGS2	1.07785	10.2658	4.30677	3.77e-05	0.00103022	2.00301
THBS1	0.728527	7.8732	4.30243	3.83e-05	0.00104077	1.98761
SAP30	0.428615	8.32409	4.28736	4.06e-05	0.00108675	1.93427
IL2RB	-0.446279	11.1388	-4.27885	4.2e-05	0.00110896	1.90418
PCED1B	-0.46871	10.2985	-4.2734	4.28e-05	0.00112309	1.88495
IRAK3	0.420289	8.82417	4.26587	4.41e-05	0.00113642	1.85837
CA2	0.485253	9.0333	4.25805	4.54e-05	0.00115501	1.83083
CD247	-0.4522	12.5151	-4.24763	4.73e-05	0.0011925	1.7942
TAOK1	0.381881	8.39112	4.23876	4.89e-05	0.00122058	1.76304
LEF1	-0.48676	9.76502	-4.21261	5.4e-05	0.00132024	1.67149
F5	0.404638	8.35999	4.21187	5.41e-05	0.0013203	1.66889
PDE4B	0.501039	8.92535	4.20191	5.62e-05	0.00135502	1.63415
HIST1H4C	-0.406675	12.0942	-4.18882	5.9e-05	0.00139763	1.58852
TLE5	-0.379322	10.526	-4.1607	6.56e-05	0.00149468	1.4909
CXCL16	0.406054	10.324	4.13809	7.14e-05	0.0015944	1.41275
CTNNAL1	0.40502	7.26046	4.13006	7.36e-05	0.00163215	1.38505
CYBRD1	0.380447	9.1903	4.1297	7.37e-05	0.00163222	1.3838
CD27	-0.415471	9.69414	-4.12605	7.47e-05	0.00164851	1.37124
ANXA3	0.696922	7.25295	4.11919	7.66e-05	0.00167329	1.34764
HLX	0.390554	8.55206	4.11635	7.74e-05	0.00168238	1.33787
TREM1	0.418583	9.46422	4.11303	7.84e-05	0.00170109	1.32647
CD2	-0.44108	11.7284	-4.09723	8.31e-05	0.00177582	1.27225
EGR1	0.648963	8.64323	4.03962	0.000102883	0.00206758	1.07584
PAQR8	-0.38666	8.89555	-4.01869	0.000111105	0.00218342	1.00501
SIAH2	0.45142	9.60456	3.99056	0.000123155	0.00235179	0.910193
ITK	-0.42691	11.14	-3.98907	0.00012383	0.00235724	0.905164
CD96	-0.401375	9.12606	-3.98611	0.000125173	0.00237226	0.895238
MAFB	0.428342	10.6825	3.98309	0.00012656	0.00239245	0.885092
ABCA1	0.419927	8.68684	3.97326	0.000131177	0.00245772	0.852115
FLT3LG	-0.389193	8.91493	-3.96666	0.000134367	0.00249984	0.830011
IER3	0.62554	10.048	3.94505	0.000145338	0.00264665	0.757816
PADI4	0.438957	10.4317	3.93855	0.000148805	0.00269815	0.736137
HIF1A	0.429765	10.19	3.9368	0.000149748	0.00270942	0.730332
VPREB3	-0.630357	8.07522	-3.92684	0.000155242	0.00277317	0.697203
PYGL	0.431369	10.5663	3.91798	0.000160293	0.00284832	0.66778
LRG1	0.41964	9.40952	3.901	0.000170407	0.00297562	0.611557
ARHGEF40	0.385064	7.63194	3.89519	0.000174007	0.00302203	0.592351
CD3D	-0.452216	12.3259	-3.88819	0.00017844	0.00306122	0.569248
GZMM	-0.402476	9.09715	-3.88722	0.000179067	0.00306347	0.566023
HIST1H2BC	0.40681	7.44463	3.88448	0.000180837	0.00308044	0.556991
CYP1B1	0.47592	9.28225	3.86468	0.000194133	0.0032521	0.491854
MAL	-0.52103	10.8753	-3.86338	0.00019504	0.0032631	0.487579
SKAP2	0.42483	9.32261	3.86221	0.000195855	0.00326703	0.483749
BNIP3L	0.609844	10.0841	3.84851	0.000205677	0.00339398	0.438845
TPST1	0.480543	7.58724	3.82461	0.000223951	0.00359365	0.360768
IL7R	-0.511555	12.3221	-3.82138	0.000226535	0.0036306	0.350249
MANSC1	0.419219	7.39242	3.81976	0.000227845	0.00363885	0.34496
AQP9	0.444504	12.391	3.80418	0.000240788	0.0037567	0.294312
IQGAP1	0.381384	10.5396	3.79668	0.000247264	0.00382716	0.269993
CAVIN2	0.684242	10.0683	3.77187	0.000269892	0.00408614	0.189777
LRRK2	0.403183	9.31425	3.75014	0.000291314	0.00434424	0.11985
PDK4	0.56626	7.80337	3.74349	0.000298192	0.00442725	0.098493
GABARAPL1	0.401693	9.63898	3.73796	0.000304019	0.00450104	0.0807844
ACSL1	0.612328	11.2335	3.70316	0.000343281	0.00488199	-0.0302922
HIST1H4H	0.450889	7.67262	3.69804	0.000349459	0.00494901	-0.0465976
MARC1	0.39496	9.56204	3.67231	0.000382079	0.00528159	-0.128133
ZFP36L1	0.519464	10.019	3.66807	0.000387721	0.00533859	-0.14152
NLRP3	0.529181	8.69547	3.65735	0.000402343	0.00547739	-0.175323
ORM1	0.641712	7.67477	3.64814	0.000415335	0.00562369	-0.204332
SNX10	0.425255	10.3846	3.64785	0.000415746	0.00562369	-0.205234
C2orf88	0.619103	8.93924	3.62381	0.000451573	0.00599292	-0.280656
NAMPT	0.560278	10.8718	3.62031	0.000457014	0.00604023	-0.291579
JUN	0.511954	8.39507	3.61393	0.000467122	0.00611752	-0.311529
OSM	0.479884	8.04546	3.59581	0.000496961	0.00638934	-0.367976
TCN1	0.560071	8.17556	3.58126	0.000522241	0.00659383	-0.413185
HK2	0.409715	8.03622	3.5731	0.000536927	0.00674369	-0.438445
LRRN3	-0.499584	7.77059	-3.53624	0.000608315	0.00740677	-0.552068
NKG7	-0.439034	12.8534	-3.53196	0.000617164	0.00747071	-0.565204
CD19	-0.468864	8.51578	-3.53187	0.000617359	0.00747071	-0.565492
GZMK	-0.532606	11.1575	-3.52106	0.000640241	0.00765433	-0.59859
LGALS2	0.447428	9.58288	3.51899	0.000644726	0.00770249	-0.604937
PROS1	0.501546	7.39864	3.51638	0.000650402	0.00774586	-0.612906
KLHL2	0.395981	9.04674	3.50746	0.000670194	0.00791157	-0.640155
C12orf57	-0.386063	11.4249	-3.48873	0.000713592	0.00829625	-0.697166
HLA-DQB1	-0.648533	8.9009	-3.48175	0.00073043	0.00841665	-0.718348
TNFAIP3	0.422338	10.4952	3.4778	0.000740149	0.00851121	-0.73035
NFKBIZ	0.505075	11.4884	3.46801	0.000764697	0.00872521	-0.759973
B3GNT5	0.394564	7.07223	3.43745	0.000846399	0.00941863	-0.852072
G0S2	0.717616	8.54482	3.42789	0.000873595	0.00961981	-0.880747
TMEM158	0.666527	8.56648	3.39037	0.000988463	0.0105542	-0.992664
RBM47	0.386256	8.91449	3.35128	0.00112318	0.0115712	-1.10826
CTSG	0.530657	7.58186	3.31739	0.0012537	0.0124639	-1.2076
PPP1R15A	0.558058	11.3151	3.31586	0.0012599	0.0124887	-1.21205
DYSF	0.411097	10.3608	3.28563	0.00138879	0.0133737	-1.29995
VCAN	0.449126	11.8427	3.28342	0.00139868	0.0134379	-1.30635
PLAUR	0.395221	9.79527	3.26248	0.00149573	0.0140665	-1.36683
PGLYRP1	0.472618	8.90859	3.26205	0.00149778	0.0140734	-1.36806
CD79A	-0.497396	9.473	-3.25332	0.00154011	0.0143295	-1.39318
FCRLA	-0.526645	8.56316	-3.22646	0.0016775	0.0151514	-1.47011
TNFSF10	0.41036	11.4274	3.22374	0.00169201	0.0152335	-1.47786
AQP10	0.421094	7.62101	3.2173	0.00172688	0.0154814	-1.49621
SH3BGRL2	0.531636	8.60108	3.21658	0.00173084	0.0155086	-1.49827
OLFM4	0.796681	6.88785	3.19378	0.00186007	0.0163541	-1.56302
NELL2	-0.444172	9.73463	-3.1735	0.00198246	0.0171885	-1.62026
IGF2BP2	0.436045	8.61932	3.16599	0.00202972	0.0174458	-1.64141
ITGA2B	0.42179	7.76933	3.15043	0.00213087	0.0180851	-1.68506
SOD2	0.417612	11.2756	3.14632	0.00215838	0.0182909	-1.69656
MCEMP1	0.418416	10.6935	3.11847	0.00235356	0.0194376	-1.77417
BCL2A1	0.667092	9.95621	3.09381	0.00253993	0.0205053	-1.8424
MEFV	0.388259	7.65831	3.07414	0.00269827	0.0214553	-1.8965
S100A12	0.511601	12.6121	3.07275	0.00270979	0.0215164	-1.9003
CXCL1	0.549154	7.54553	3.05882	0.00282797	0.0221877	-1.93846
MPO	0.45572	7.5205	3.05461	0.00286456	0.022374	-1.94994
CEACAM6	0.518674	7.01303	3.01687	0.00321312	0.0243014	-2.05243
ECHDC3	0.393917	8.01051	2.98937	0.00349123	0.0259742	-2.12641
CSRNP1	0.456529	10.0244	2.98252	0.00356391	0.0263005	-2.14476
SAMSN1	0.537053	8.66273	2.98138	0.00357618	0.0263471	-2.14782
ICOS	-0.403201	8.79302	-2.96913	0.00371005	0.0270889	-2.18053
NLRC4	0.404516	8.00739	2.95043	0.00392334	0.0280753	-2.23023
PLEK2	0.403176	8.18109	2.94003	0.00404685	0.0287279	-2.25778
XK	0.562385	7.54884	2.91718	0.00433073	0.0301686	-2.31798
VNN1	0.389797	8.34922	2.91036	0.0044189	0.0306221	-2.33586
CLC	-0.644114	11.3413	-2.90424	0.00449949	0.0309141	-2.35189
GNLY	-0.469386	12.0346	-2.89964	0.00456103	0.0311846	-2.36393
CXCL8	0.996349	10.8281	2.89434	0.00463267	0.0315331	-2.37775
IL1B	0.722021	10.9036	2.87843	0.00485435	0.0324539	-2.41916
FECH	0.431394	8.23764	2.87716	0.00487255	0.0325241	-2.42247
NR4A2	0.524792	8.17213	2.83558	0.00550077	0.0354016	-2.52974
GPR84	0.404455	7.62532	2.82711	0.00563743	0.0359522	-2.55142
LCN2	0.564603	9.15233	2.8241	0.00568671	0.0361436	-2.55911
TENT5C	0.634218	11.2225	2.81923	0.00576747	0.0364889	-2.57155
HEMGN	0.387167	7.44267	2.80758	0.00596473	0.0372239	-2.60123
TP53INP2	0.408038	8.44063	2.79983	0.0060993	0.0378816	-2.62091
CA1	0.584756	8.68578	2.70601	0.00796346	0.0461487	-2.85542
HP	0.393344	7.83829	2.69218	0.00827837	0.0474041	-2.88942
HMGB2	0.384564	10.1723	2.68538	0.00843733	0.0481347	-2.90607
